1 **TITLE**

2 Multi-parametric analysis of 58 SYNGAP1 variants reveal impacts on GTPase signaling,  
3 localization and protein stability

4

5 **AUTHORS**

6 Fabian Meili<sup>1</sup>, William J. Wei<sup>2</sup>, Wun-Chey Sin<sup>1</sup>, Iulia Dascalu<sup>2</sup>, Daniel B. Callaghan<sup>3</sup>, Sanja  
7 Rogic<sup>3,4</sup>, Warren M. Meyers<sup>1</sup>, Paul Pavlidis<sup>1,3,4</sup>, \*Kurt Haas<sup>1,2</sup>

8

9 **AUTHOR AFFILIATIONS**

10 <sup>1</sup>Djavad Mowafaghian Centre for Brain Health, University of British Columbia, Vancouver,  
11 Canada; <sup>2</sup>Department of Cellular and Physiological Sciences, University of British Columbia,  
12 Vancouver, Canada; <sup>3</sup>Department of Psychiatry, University of British Columbia, Vancouver,  
13 Canada; <sup>4</sup>Michael Smith Laboratories, University of British Columbia, Vancouver, Canada

14 \* **Corresponding author**

15

16 **CONTACT INFORMATION**

17 Dr. Kurt Haas

18 2211 Wesbrook Mall, Rm F162

19 Vancouver, BC V6T2B5, Canada

20 (604)822-9770

21 [kurt.haas@ubc.ca](mailto:kurt.haas@ubc.ca)

22 **KEY WORDS**

23 ASD; ID; functional variomics; missense mutations; SYNGAP; schizophrenia; epilepsy

24 **ABSTRACT**

25 SYNGAP1 is a Ras and Rap GTPase with important roles in regulating excitatory synaptic  
26 plasticity. While many *SYNGAP1* missense and nonsense mutations have been associated with  
27 intellectual disability, epilepsy, schizophrenia and autism spectrum disorder (ASD), there are  
28 many variants of unknown significance (VUS). In this report, we characterize 58 variants in nine  
29 assays that examine multiple aspects of SYNGAP1 function. Specifically, we used multiplex  
30 phospho-flow cytometry to measure the impact of variants on pERK, pGSK3 $\beta$  and pCREB and  
31 high-content imaging to examine their subcellular localization. We find variants ranging from  
32 complete loss-of-function (LoF) to wildtype (WT)-like in their ability to regulate pERK and  
33 pGSK3 $\beta$ , while all variants retain at least partial ability to regulate pCREB. Interestingly, our  
34 assays reveal that a high percentage of variants located within the disordered domain of unknown  
35 function that makes up the C-terminal half of SYNGAP1 exhibited LoF, compared to the more  
36 well studied catalytic domain. Moreover, we find protein instability to be a major contributor to  
37 dysfunction only for two missense variants both located within the catalytic domain. Using high-  
38 content imaging, we find variants with nuclear enrichment/exclusion and aberrant nuclear speckle  
39 localization. These variants are primarily located within the C2 domain known to mediate  
40 membrane lipid interactions. We find that mislocalization is distinct from altered catalytic activity,  
41 highlighting multiple independent molecular mechanisms underlying variant dysfunction. Our  
42 multidimensional dataset allows clustering of variants based on functional phenotypes and  
43 provides high-confidence pathogenicity classification.

## 44 INTRODUCTION

45 The Ras and Rap-GTPase activating protein (GAP) SYNGAP1 is a 1343 amino acid (AA) protein  
46 that contains a core GAP domain and an auxiliary C2 domain essential for its regulation of  
47 secondary GTPase targets including Rheb, Rab and Rac<sup>1-8</sup>. As a GAP, SYNGAP1 promotes the  
48 dephosphorylation of GTP to GDP by GTPases, thereby inhibiting GTPase signaling by reducing  
49 the abundance of their active, GTP-bound form.

50 SYNGAP1 is one of the most abundant proteins at the post-synaptic density (PSD)  
51 complex of excitatory glutamatergic synapses<sup>6-8</sup>. As such, it is well poised to regulate activity-  
52 dependent cytoskeletal reconfigurations and AMPA receptor (AMPA) trafficking associated  
53 with both long-term potentiation (LTP) and long-term depression (LTD), processes mediated by  
54 Ras and Rap respectively<sup>9-12</sup>. SYNGAP1 binds to the scaffolding proteins PSD95, MUPP1, and  
55 SAP102/DLG3, and closely associates with NMDA receptors (NMDARs). Synaptic innervation  
56 triggering calcium influx activates Ca<sup>2+</sup>/calmodulin-dependent protein kinase II (CaMK2), which  
57 then translocates to the PSD and phosphorylates SYNGAP1, causing its dissociation from PSD  
58 scaffolding proteins<sup>2,3,10,13-15</sup>. Its removal causes local increased Ras-activity and AMPAR  
59 exocytosis<sup>12,16</sup>. Ras-ERK signaling also promotes expression of immediate early-response genes  
60 by activating CREB<sup>17-20</sup>. SYNGAP1 is also implicated in LTD, due to its regulation of Rab5 and  
61 Rap1<sup>3,16,21</sup>. In contrast to phosphorylation by CaMK2, phosphorylation of SYNGAP1 by the  
62 protein kinases CDK5 and PLK2 shifts its affinity and GAP activity from Ras to Rap, a GTPase  
63 that induces AMPAR endocytosis by activating p38<sup>2,11,12,22-24</sup>. SYNGAP1 thus is positioned to act  
64 as a regulator of both Ras-ERK-LTP and Rap-p38-LTD signaling.

65 SYNGAP1 is predominantly expressed in the developing brain and dysfunction of LTD  
66 and LTP is believed to contribute to several neurodevelopmental disorders<sup>25-29</sup>. Indeed, reduced

67 function of SYNGAP1 leads to the disruption of several synaptic signaling pathways, and  
68 mutations in *SYNGAP1* are associated with intellectual disability (ID), epilepsy, and syndromic  
69 SYNGAP encephalopathy<sup>30–32</sup>. *SYNGAP1* (MIM: 603384) mutations have also been identified in  
70 individuals with schizophrenia and autism spectrum disorder (ASD)<sup>33–35</sup>. SYNGAP1 dysfunction  
71 in model systems replicates disease-associated phenotypes, as a knockdown of zebrafish *syngap1*  
72 results in delayed brain development and seizure-like behavior<sup>36,37</sup>. Underscoring the importance  
73 of its regulation on LTP/LTD balance, homozygous *Syngap1* null mice die within a week after  
74 birth with an increase in neuronal apoptosis, while heterozygous mice have defects in LTP, social-  
75 and fear-conditioning and have increased basal activity levels of Rac and ERK<sup>38–43</sup>. Abnormal  
76 ERK activation causes epileptic seizures in mice and the Ras-ERK pathway is commonly  
77 dysregulated in chronic schizophrenia<sup>44–47</sup>. *Syngap1* heterozygous hippocampus neurons also do  
78 not exhibit LTD, presumably through aberrant cofilin activation via Rac<sup>33,48</sup>. Overexpression of  
79 SYNGAP1 has the opposite effect and leads to elevated levels of p38, inhibition of ERK, and a  
80 reduction of surface AMPARs<sup>49,50</sup>. Additionally, SYNGAP1 has been shown to regulate  
81 apoptosis, a process that, like LTD, is regulated by GSK3 $\beta$ <sup>42,51–55</sup>.

82 While many mutations in *SYNGAP1* are identified as pathogenic early  
83 termination/truncating variants, there is a growing number of missense variants of unknown  
84 significance (VUS) for which potential contribution to disease development is unclear. To  
85 strengthen clinical relevance of *in vitro* findings, and allow for structure-function prediction,  
86 functional variomics provides multi-dimensional, deep phenotypic characterization of disease-  
87 associated missense variants<sup>56–60</sup>. Here, we use high-throughput multiplex-phospho flow  
88 cytometry and high-content screening to measure the impact of 58 variants on protein localization,  
89 stability and function in multiple disease-associated signaling pathways, including pERK,

90 pGSK3 $\beta$ , pCREB and pp38 in human embryonic kidney (HEK293) cells. We find diverse impacts  
91 of variants and provide deep functional evidence to classify variants as either Likely Pathogenic  
92 or Likely Benign.  
93

## 94 MATERIAL AND METHODS

### 95 SYNGAP1 variant selection and cloning

96 *SYNGAP1* Isoform I (Accession NM\_006772.2) was purchased from Genecopoeia (Genecopoeia,  
97 EX-H9502). Variants were selected from a variety of sources, including a database of variants  
98 isolated in patients without serious pediatric disease (gnomAD<sup>61</sup>), the disease-associated variant  
99 database ClinVar<sup>62</sup>, the ASD/ID-associated variant databases SFARI<sup>35</sup>, DDD<sup>63</sup> and MSSNG, as  
100 well as clinical literature sources<sup>30–32,64–68</sup>. We also included a set of likely loss of function (LoF)  
101 variants, termed biochemical controls, which are known phosphorylation targets of kinases that  
102 regulate SYNGAP1 catalytic ability (CaMK2: Ser1165; CDK5: Ser788, Thr790, Ser817; PLK2:  
103 Ser385), as well as variants at sites described as LoF in non-human homologues of SYNGAP1  
104 (Arg485, Asn487, Leu595 and Arg596)<sup>2,22,24,69</sup>. Detailed annotation and sourcing of all variants  
105 tested can be found in Table S1. Variants selected were located across the length of the protein,  
106 including the four well-annotated domains, including 2xPH, C2, and the Ras/Rap-GAP domain,  
107 and within a disordered domain of unknown function (DUF). Variants were generated using three-  
108 way Gibson cloning using NEB HiFi DNA Assembly Cloning Kit (NEB, E5520), using a NotI-  
109 AscI-digested and purified pENTR backbone (Thermo Scientific, K240020) as well as two PCR-  
110 amplified *SYNGAP1* DNA fragments (Start Codon to mutation and mutation to Stop Codon). All  
111 variants were then transferred to a custom-made pCAG-mtag-RFP-T-P2A-sfGFP-attr1-ccdb-attr2)  
112 destination vector using Gateway cloning (Thermo Scientific, 11791020). Plasmid DNA was  
113 isolated using QIAprep Spin Miniprep Kits (Qiagen, 27106).

114

### 115 Variant assays for stability, function and localization

116 We investigated whether different missense variants would have impact on protein stability – a  
117 major cause of missense variant dysfunction in other genes. To assess this, we used a dual-color  
118 RFP-P2A-GFP-*SYNGAP1* construct that would express RFP and GFP at equal rates but as two  
119 separate proteins. A reduction in GFP/RFP ratio is indicative of protein instability. To determine  
120 variant functional impacts, we assayed the phosphorylation states of several signaling proteins  
121 within different, synapse-relevant signaling cascades. We selected assays for pERK1/2 and  
122 pCREB as promoters of LTP, and pGSK3 $\beta$  and pp38MAPK as promoters of LTD. Since  
123 *SYNGAP1* in neurons is highly localized to the PSD complex, we analyzed whether variants  
124 exhibited differences in subcellular localization in HEK293 cells. We find that WT *SYNGAP1*  
125 localized to the nucleus in discrete speckles and used CellProfiler to measure the frequency and  
126 shape of speckles, as well as the nucleus/cytoplasm ratio as a metric for nuclear enrichment.  
127 Individual variant means, error, N and p-values for each assay are provided in Table S2.

128

## 129 **Cell Culture**

130 HEK293 cells purchased from the American Type Culture Collection (CRL-1573) and were  
131 routinely passaged in Dulbecco's Modified Eagle's Medium (DMEM) (Millipore Sigma D6046)  
132 supplemented with 10% FBS and 100U/mL Penicillin-Streptomycin (referred to as “culture  
133 media” hereafter). For all experiments herein, HEK293 cells were used for a maximum of 15  
134 passages. For flow cytometry experiments, cells were seeded at  $1 \times 10^5$  per well in 24 well dishes  
135 16-20hrs before transfection with 500ng of expression plasmid using X-tremeGENE 9 at a ratio of  
136 2 $\mu$ L to 1 $\mu$ g DNA. 24h after transfection cells were washed with culture media. 24h later, cells were  
137 stimulated for 10 minutes with fresh culture media, then washed once in 1xPBS before treated  
138 with Trypsin-EDTA (Gibco, 25200072) for 5 minutes to create a single-cell suspension and then

139 fixed for 10 minutes in 3.2% PFA. Cells were then spun down and resuspended in 100% ice-cold  
140 methanol, kept at 4C for 30min before being moved to -20C. For protein localization experiments,  
141 cells were seeded at  $1.8 \times 10^4$  per well in 96-well black polymer collagen-coated plates (Thermo  
142 Scientific) 16-20hrs before transfection. Cells were fixed in 4% PFA with 1:5000 Hoechst-33342  
143 for 20 minutes.

144

### 145 **Antibody Staining and Flow Cytometry**

146 Cells were washed with Flow Cytometry Staining Buffer (FC001, R&D Systems) and then stained  
147 in 50ul of Staining Buffer for one hour on ice with the following conjugated antibodies multiplexed  
148 at the indicated dilutions: (1) Mouse monoclonal antibody (mAb) anti-Human pS9-GSK-3 $\beta$ -Alexa  
149 Fluor 405, 1:50 (R&D Systems, IC25062V), (2) Mouse mAb anti-Human pT202/pY204-  
150 pERK1/2-PerCP-eFluor710, 1:200 (Thermo Scientific, 46-9109-41), (3) Rabbit mAb anti-Human  
151 pT180/pY182-p38MAPK-PE-Cy7, 1:100 (NEB, 51255), (4) Rabbit mAb anti-Human pS133-  
152 CREB-Alexa Fluor 647, 1:50 (NEB, 14001), (5) Mouse mAb anti-Human GAPDH-Dylight680,  
153 1:50 (Thermo Scientific, MA515738D680). Cells were then washed twice with Staining Buffer  
154 before being run on an Attune Nxt Flow Cytometer (Invitrogen). Data was recorded using VL-1  
155 (pGSK3 $\beta$ -Alexa Fluor 405), BL-1 (sfGFP), BL-2 (pERK1/2-PerCP-eFluor710), YL-1 (mtagRFP-  
156 T), YL-3 (pp38-PE-Cy7), RL-1 (pCREB-Alexa Fluor 647) and RL-2 (GAPDH-Dylight680)  
157 channels, which were single-stain compensated. Using FlowJo, Cells were selected using FSC-  
158 H/SSC-H and single cells were selected using SSC-H/SSC-A. In-well untransfected control  
159 population was selected using BL-1 (sfGFP) and YL-1 (mtagRFP-T) values within spread of  
160 values of untransfected control cells, transfected population was selected using BL-1 (sfGFP)  
161 values above untransfected to 100-fold above untransfected (Fig S1a).



162

### 163 **High-Content Imaging**

164 Images of 20 fields from each well were collected using the ArrayScan XTI Live High Content  
165 Platform (Thermo Scientific). A 20x objective (NA = 0.4, resolution = 0.69  $\mu\text{m}$ ) was used to  
166 capture widefield images with excitation wavelengths of  $386 \pm 23$ ,  $485 \pm 20$ , and  $549 \pm 15$  nm for  
167 imaging of Hoechst, GFP, and RFP respectively. The emission filter wavelengths are  $437 \pm 25$ ,  
168  $520 \pm 12$ , and  $606 \pm 23$  nm respectively. CellProfiler 3.0<sup>70</sup> was used to analyze the data by  
169 identifying nuclei space from Hoechst, cytoplasm space from RFP and nuclear speckles and  
170 localization from GFP, respectively. We applied a filter of nuclei and speckle size <1000 pixels as  
171 well as cytoplasm size between 200 and 1000 pixels to eliminate imaging artifacts.

172

### 173 **Data Analysis**

174 Relative functional values for each reporter-antibody were obtained by the median of (Individual  
175 Transfected Cell Value – Background Value) / (In-well Untransfected Control Median Value –  
176 Background Value) values normalized to the sfGFP control = 0 and WT SYNGAP1 = 1 except for  
177 stability, where values were normalized to zero as the floor. All data processing, statistical analysis  
178 and clustering was performed in Visual Code using python, matplotlib, sklearn and seaborn  
179 libraries.

## 180 **RESULTS**

### 181 **ASD/ID-associated missense variants of SYNGAP1 are found throughout the protein**

182 To investigate the impact of variants in multiple domains, we selected 58 variants located  
183 throughout the SYNGAP1 protein, including its annotated PH, C2, and GAP, and the C-terminal  
184 domain of unknown function (DUF) domain (Fig 1a, Table S1). 28 variants were identified in  
185 individuals with ASD/ID and were assigned the primary category ASD/ID. 17 variants were  
186 located at sites known to affect SYNGAP1 function and were assigned as biochemical controls  
187 (BIOCHEM). 12 variants have not been identified in any patients to date but were found in a  
188 database of people without reported pediatric disease (gnomAD<sup>61</sup>). To study the effects of  
189 missense mutation on multiple functions of SYNGAP1 we assayed phosphorylated residues of  
190 signaling proteins directly downstream of known SYNGAP1 function (Fig 1b). We assayed  
191 SYNGAP1 interactions with Ras by assaying phosphorylation states of ERK (pT202/pY204),  
192 which is located within the canonical MAPK cascade downstream of Ras<sup>3,43,46,49</sup> as well as both  
193 pS9 on GSK3 $\beta$  and pS133 on CREB, which are known to be indirectly regulated by Ras<sup>47,51,54,71</sup>.  
194 To assess SYNGAP1 function towards Rap we assayed pT180/pY182 on p38 MAPK, which is  
195 known to be regulated by SYNGAP1 via MUPP1<sup>13,23,49</sup>.

196

### 197 **SYNGAP1 missense variants exhibit deficits in inhibiting ERK and GSK3 $\beta$ phosphorylation**

198 We first measured the level of phosphorylated ERK1/2, which correlates with Ras activation and  
199 is downregulated by SYNGAP1 (Fig 1b). WT SYNGAP1 reduced phosphorylation of ERK1/2 by  
200 28% compared to levels in untransfected cells. We found variants exhibited a wide range of  
201 dysfunction, with 18/58 variants showing complete loss-of-function (LoF), and 22/58  
202 demonstrating partial LoF (Fig 2a). The two missense variants with the lowest (R485A and

203 N487T) and highest (S788A and T790A) functional scores were biochemical controls. R485A and  
204 N487T have been previously described as LoF variants, while S788A is a known gain-of-function  
205 (GoF) variant and T790A a hypothesized GoF variant based on its proximity to Ser788<sup>2,5,69</sup>.  
206 Notably, we observed that across variants, dysfunction was more severe in C-terminal variants,  
207 with no variant with less than 50% function being located before amino acid (AA) 485, and all  
208 variants past AA800 exhibiting significant LoF (Fig 2b). We find variants located in well-  
209 annotated structural domains such as the two PH domains, the C2 domain and the GAP domain to  
210 generally have less severe of an impact than variants within the disordered domain of unknown  
211 function that makes up the latter half of the protein.

212 Inhibitory effects of SYNGAP1 on the Ras/ERK pathway have been widely  
213 described<sup>4,8,38,46,49</sup>. Here, we demonstrate for the first time that SYNGAP1 also regulates a parallel  
214 Ras/ GSK3 $\beta$  pathway. Overexpression of WT SYNGAP1 leads to dephosphorylation at Ser9 and  
215 thus activation of GSK3 $\beta$ <sup>51</sup> (Fig 2c). Importantly, the degree of dysfunction of SYNGAP1 variants  
216 with respect to ERK inhibition highly correlated with the amount of GSK3 $\beta$  activation, however  
217 with lower magnitude (Fig 2d).

218 P38 MAPK is known to be a downstream target of SYNGAP1 (Fig 1b), and we find that  
219 WT SYNGAP1 overexpression significantly dephosphorylates p38 MAPK<sup>13,23</sup>. However, none of  
220 the SYNGAP1 variants showed any significant difference compared to WT (Fig 2e), except for  
221 LoF of the biochemical control S1165L, which is known to link SYNGAP1 activity to p38 via  
222 CAMK2<sup>2</sup>.

223

224 **Missense-induced protein instability is not a major cause of dysfunction in SYNGAP1**

225 We next explored whether a measure of protein stability may explain some of our findings, since  
226 protein instability is a major mechanism of missense variant dysfunction for other proteins<sup>56,57,72,73</sup>.  
227 However, we find SYNGAP1 to be largely resistant to missense-induced instability, with only  
228 three of the 58 missense variants tested, R573L, T790A and P562L, exhibiting significant loss of  
229 stability, while retaining (Fig 2f). The two early termination variants R579X and R687X were,  
230 unsurprisingly, the most unstable, showing ~23% of WT protein abundance. R1240X however,  
231 despite missing the last ~100 amino acids of the protein, retained 88% of WT stability. Three  
232 missense variants showed significant hyper-stability (S1165L, E1286D and R596A), and in the  
233 case of R596A, this increase of ~80% was dramatic.

234

### 235 **Dephosphorylation of CREB independent of ERK/GSK3 $\beta$ dysfunction**

236 The transcription factor CREB is a major regulator of neuronal plasticity and survival and is  
237 downstream of several disease-associated signaling pathways, including Ras-ERK<sup>74,75</sup> (Fig 1b).  
238 We find that WT SYNGAP1 significantly decreases levels of pCREB by 26%, similar to its effects  
239 on pERK. Moreover, we find that while some variants were fully unable to inhibit ERK, all  
240 variants tested suppressed CREB phosphorylation (Fig 3a). 8/58 variants exhibited partial LoF,  
241 including known LoF variants at sites phosphorylated by CDK5 (S817A) and CAMK2 (S1165L),  
242 while 9/58 variants had a GoF phenotype (again including the known GoF variants S788A and  
243 T790A). While functional scores for pCREB were correlated to pERK functional scores (Fig 3b),  
244 they were more strongly correlated with the flow-cytometry physical property read-out Side  
245 Scatter (SSC), a measure of cell granularity (Fig 3c, d). Changes in SSC are associated with  
246 apoptosis and cell death, which is regulated by pCREB levels in neurons<sup>74,76-78</sup>.

247

## 248 **Nuclear exclusion is correlated with decreased pCREB**

249 To explore alternate functional pathways that may explain the findings from our pCREB assay,  
250 we examined the subcellular localization of overexpressed SYNGAP1 variants. WT SYNGAP1  
251 and variants showed varying levels of either nuclear enrichment or exclusion (Fig 4a, b). 13/58  
252 variants were found to be nuclear enriched, while 29/58 variants showed nuclear exclusion.  
253 Notably, the functional scores of variants in our pCREB assay were negatively correlated with  
254 their nuclear enrichment, as variants with nuclear enrichment had higher levels of pCREB, while  
255 variants with more nuclear exclusion had lower levels of pCREB (Fig 4c). Intriguingly, there was  
256 one variant, W362R, which despite strong nuclear enrichment retained the ability to effectively  
257 dephosphorylate CREB.

258

## 259 **SYNGAP1 variants exhibited diverse subcellular and nuclear localization phenotypes**

260 We find that SYNGAP1 localizes to puncta (Fig 4b) within the nucleus, and sequence analysis  
261 shows that SYNGAP1 contains a poly-histidine repeat from His957 to His966, a repeat that can  
262 act as a nuclear speckle targeting domain<sup>79,80</sup>. SYNGAP1 speckled localization has been  
263 previously observed<sup>55,81</sup>. We used two parameters that could capture this phenotype – the percent  
264 of nuclear puncta that were smaller than 200 pixels (Fig 5a) and the circularity of these speckles,  
265 with more irregularly shaped speckles having lower circularity values (Fig 5b). More than half of  
266 SYNGAP1 variants showed a decrease in percentage (39/58) and circularity (33/58) of speckles.  
267 Six variants, including the seemingly minor substitution E1286D, and a variant lacking the C-  
268 terminal domain (R1240X) exhibiting a GoF phenotype of having both a larger percentage of, and  
269 in the case of E1286D also more rounded speckles. While speckle percentage and circularity were  
270 correlated with each other (Fig 5c), they showed little correlation with other metrics we measured,

271 indicating they might be capturing a distinct function of SYNGAP1. Counter to the functional  
272 results in signaling assays, variants with stronger mislocalization phenotypes were localized to the  
273 first half of the protein (Fig 5d). L327P, C233Y and W362R, variants close to, or within the C2  
274 domain, exhibited severe LoF for localization, indicating that these domains may be more  
275 important in subcellular localization of SYNGAP1 than for its GTPase function.

276

### 277 **Clustering analyses**

278 Normalized functional scores for all variants across measures are shown in Fig 6a. Overall, we  
279 find strong correlation of functional scores across different signaling assays, but not between  
280 signaling and localization assays, with the exception of significant negative correlation between  
281 nuclear localization and CREB phosphorylation (Fig 6b, Fig S1b). We applied two approaches  
282 towards clustering analysis. First, we clustered variants by functional measure scores generating a  
283 cluster heatmap to highlight the most closely correlated variants (Fig 6c). Notably, R596A is not  
284 closely correlated to any other variant in the study, likely because of its strong GoF phenotype in  
285 stability and speckle circularity. Cluster results reveal that missense variants distributed across  
286 SYNGAP1 can have very similar effects on a wide range of phenotypes, such as R485A and  
287 M759V, or R47Q and R596K, the two most similar pairs of variants in this study.

288 To illustrate large-scale associations and clusters of variants, we performed Principal  
289 Component Analysis (PCA) followed by KMeans clustering on the entire dataset (Fig 6d, Fig S1c).  
290 The first PC axis (PC-1) accounts for 38.5% of variation in the dataset and is largely made up  
291 phospho-flow scores as well as nuclear localization phenotypes, while the second PC axis (PC-2)  
292 features mostly stability and speckle phenotypes, accounting for 21.8% of variation. KMeans  
293 clustering reveals four groups of variants: a set of variants that are largely LoF across phenotypes

294 (Turquoise); a second set of variants that are largely WT-like across phenotypes (Black); as well  
295 as two additional clusters containing variants with outlier phenotypes in a subset of assays. The  
296 two nonsense variants R687X and R579X, as well as the missense variants P562 and R573L are  
297 part of the first outlier cluster (Black) as four of the only five variants in this study that exhibited  
298 protein instability. This same grey cluster also contains the C2-domain and closely associated  
299 variants C233Y, L327P and W362R because of their strong LoF in speckle localization  
300 phenotypes. The second outlier cluster (Lime) contains many of the variants that show a GoF  
301 phenotype in assays. D332N, R596A, S296P and S788A are GoF in multiple assays, while  
302 E1286D is hyper-stable with GoF only in localization phenotypes.

303

#### 304 **Multi-parametric pathogenicity prediction**

305 Based on all measures of relative variant function, we devised criteria to predict whether variants  
306 were likely pathogenic, likely benign or whether we were unable to make a prediction and a variant  
307 remains a variant of unknown significance (VUS). Since no variant exhibited less than 50%  
308 function in metrics for pCREB or SSC, we did not use this measure for classification. A variant  
309 was classified as Likely Pathogenic (LP) if it had less than 50% or more than 150% function in  
310 either 2 out of 3 signaling assays (pERK, pGSK3 $\beta$  or pp38), 2 of 3 localization assays (Speckle  
311 Circularity, Speckle Percentage, or Nuclear Localization), or stability. If a variant didn't fulfill any  
312 of these criteria but had less than 50% or more than 150% function in at least 1 assay, we classified  
313 it as remaining VUS. If a variant appeared >50% functional in all assays in this study, we classified  
314 it as Likely Benign (LB). Based on these rules, we classify 40 variants of SYNGAP1 as either  
315 Likely Pathogenic (25/58) or Likely Benign (15/58), while we are unable to make a confident  
316 classification determination for 18/58 variants that retained a classification of VUS (Fig 7a). We

317 find that nearly all variants in the C-terminal DUF/Disordered Domain are either Likely  
318 Pathogenic (11/21) or VUS (9/21), with only one variant, P741S, being Likely Benign (Fig 7b).  
319 We find Likely Pathogenic, Likely Benign and VUS variants across disease association categories,  
320 with 12/23 ASD-associated variants being Likely Pathogenic, 5 being Likely Benign and 6  
321 remaining VUS, while we find that of the 13 variants we tested that are present in the non-disease  
322 associated reference database gnomAD, 4 are Likely Pathogenic, 4 are Likely Benign, and 5 are  
323 VUS (Fig 7c).



## 324 **DISCUSSION**

325 We have characterized the functional effects of 58 variants of SYNGAP1 in nine different  
326 functional assays. While the impact on ERK inhibition of biochemical control variants is consistent  
327 with previous findings<sup>4,8</sup>, our results show important differences in the effects of mutations in  
328 different domains specific to multiple functions of SYNGAP1 and allow us to make high-  
329 confidence prediction of variant pathogenicity. We find a range of dysfunction from complete LoF  
330 to full WT-level functionality in the impact of SYNGAP1 overexpression (OE) on pERK and  
331 pGSK, while all variants assayed retained at least partial function to downregulate CREB. These  
332 results indicate that the inhibitory effects of SYNGAP1 OE on CREB are not solely due to its  
333 action on Ras/ERK/GSK3 $\beta$ , but through additional pathways leading to a reduction in pCREB. In  
334 addition, we find variants affect the ability of SYNGAP1 to localize to nuclear speckles, providing  
335 support for a role of this protein in the nucleus.

336 We find that nuclear excluded variants were better able to dephosphorylate CREB. While  
337 CREB is primarily localized in the nucleus both in neurons and HEK293 cells<sup>82</sup>, our results  
338 indicate that the initiation of CREB dephosphorylation by SYNGAP1 may take place in the  
339 cytoplasm. In neurons, there is evidence that phosphorylated CREB is also localized to axons and  
340 dendrites and regulation of CREB phosphorylation plays an important role in neuronal survival,  
341 synaptic plasticity, and dendritic growth<sup>83–88</sup>. We identify SYNGAP1 variants deficient in  
342 subcellular localization primarily in and adjacent to the C2 domain. In other proteins, C2 domains  
343 are known bind to phospholipids at the plasma membrane and missense mutations in the C2  
344 domain have been shown to cause mislocalization<sup>89–93</sup>, matching our results and indicating a  
345 similar role of this domain in SYNGAP1. Surprisingly, variants localized within the disordered  
346 domain of unknown function (DUF) in the C-terminal half of the protein exhibited the most

347 significant dysfunction in our signaling assays, to a greater extent than variants within the GAP  
348 domain. These results support further characterization of the DUF domain and its interaction with  
349 SYNGAP1's GAP domain for understanding missense variant-induced SYNGAP1 dysfunction<sup>94-</sup>  
350 <sup>96</sup>.

351 We hypothesize that few of the variants in our study contribute to protein instability  
352 presumably because as a 1343AA protein, SYNGAP1 is relatively large and can compensate for  
353 individual AA substitutions more readily. Indeed, a multi-protein comparative study analyzing  
354 missense variants has confirmed the trend that larger proteins tend to be more resistant to missense-  
355 induced instability<sup>97</sup>. Two of three instability-inducing variants were located within a span of 11  
356 AA in the center of the GAP domain, and P562L has been previously described as unstable,  
357 indicating that only mutations in specific regions of SYNGAP1 may induce instability<sup>32</sup>.

358 We find two variants that exhibited significant GoF phenotypes across several assays.  
359 R596A is localized in highly conserved motif in GAPs, an FLR arginine-finger loop that  
360 determines substrate specificity across RasGAPs<sup>69</sup>. Since an alanine substitution of Arg596 will  
361 disrupt this motif it is surprising that it would both significantly increase protein stability and retain  
362 or enhance function. Further study of the FLR loop in SYNGAP1 and how it differs from other  
363 RasGAPs such as p120GAP and NF-1 is warranted. E1286D, on the other hand, is a seemingly  
364 minor change from one negatively charged residue to another. While deleterious effects of this  
365 conservative substitution have been described in functional roles and thermal stability, it is not  
366 well characterized<sup>98,99</sup>. The effect of C-terminal substitutions on SYNGAP1 localization in our  
367 assay is supported by the result that removing the last 100 amino acids of SYNGAP1, as in  
368 R1240X, produces a GoF phenotype similar to E1286D. The function of the C-terminal domain  
369 of SYNGAP1, specifically the  $\alpha$ 2-isoform used in this study, remains elusive. Despite lacking the

370 C-terminal QTRV-motif found in the  $\alpha$ 1-isoform, which confers binding to PDZ-motifs,  $\alpha$ 2 is  
371 similarly able to localize to the PSD<sup>15</sup>. Several studies, however, have highlighted that the presence  
372 or absence of the QTRV motif is important for SYNGAP- $\alpha$ 1 function and its activity-dependent  
373 movement from the PSD core<sup>29,100</sup>. Our results indicate that the C-terminal domain of SYNGAP1-  
374  $\alpha$ 2 also plays a critical role in subcellular localization.

375         Based on our nine assays, we classify 58 variants, including 16 variants with previous  
376 annotations on the disease-associated variant database ClinVar, as Likely Benign, Likely  
377 Pathogenic or VUS. Our findings agree with the previous classification of L327P and W362R as  
378 Pathogenic, as well as R170Q and S1165L as Likely Pathogenic. However, some of findings  
379 disagree with the ClinVar assessment. G511R is present in ClinVar as a single submission with no  
380 condition information and has been identified in one individual with epilepsy and autism, while  
381 our findings indicate this variant to be likely benign. It is possible that while we used the ClinGEN  
382 recommended cutoff of 50% function for classification, milder defects could still be pathogenic,  
383 and G511R shows the second-largest nuclear enrichment of all variants in this study (41% increase,  
384  $p=2.3*10^{-8}$ ), providing a possible explanation for the discrepancy. It is also possible that our assays  
385 weren't able to capture certain neuron-specific phenotypes of variant dysfunction or that it is  
386 indeed a benign mutation not contributing to patient phenotype. Three variants of SYNGAP1 are  
387 present in, and are annotated as Benign in ClinVar: S385W, A1045G and I1115T. While we are  
388 unable to make a definitive classification for I1115T, we classify both S385W and A1045G as  
389 Likely Pathogenic. S385W is present as a single submission with no condition information on  
390 ClinVar, but Ser385 is both a confirmed phosphorylation target for PLK2<sup>22,24</sup>, and S385W has  
391 significant LoF in all five of our flow cytometry functional assays. A1045G is one of the most  
392 common SYNGAP1 variants in gnomAD and was classified as Benign based on its presence there.

393 However, it shows complete LoF for both pERK and pGSK3 $\beta$  inhibition in our assays, and is also  
394 present with >6-fold enrichment in the SCHEMA consortium's whole-exome database of  
395 Schizophrenia-associated variants than in gnomAD, and has been identified in an individual with  
396 ASD<sup>34,61,66</sup>. These findings highlight that for low-penetrance variants in multi-genic diseases,  
397 heightened presence of an allele in the general population does not necessarily indicate that an  
398 allele is Benign. Indeed, large-scale sequencing studies find the presence of seemingly deleterious  
399 alleles in otherwise healthy populations at frequencies of more than 100 LoF variants per  
400 person<sup>101,102</sup>. Further, other genes in similar multi-genic diseases, such as hypertrophic  
401 cardiomyopathy, exhibit high-frequency, low-penetrance pathogenic alleles<sup>103</sup>. Here, we are able  
402 to add functional evidence and reclassify four variants that were previously annotated on ClinVar  
403 only as either VUS or Conflicting (S535T as Likely Benign; P562L, G949S and E1286D as Likely  
404 Pathogenic), while for 41 variants we provide the first high-confidence pathogenicity predictions  
405 to guide clinicians and researchers.  
406

407 **SUPPLEMENTAL DATA**

408 Supplemental Data includes one figure and two tables.

409

410 **AUTHOR CONTRIBUTIONS**

411 Variant selection and annotation were performed by FM, DBC, SR and PP. Variants were  
412 generated by ID and FM. Cell culture and flow cytometry experiments were developed and  
413 performed by WMM, WW and FM. High-Content Imaging was performed by WW, WCS and FM.  
414 Data analysis was performed by FM. The manuscript was written by FM with editorial assistance  
415 from WMM, WCS and KH.

416

417 **ACKNOWLEDGMENTS**

418 This work was supported by a grant from the Simons Foundation/SFARI (Grant #573845,  
419 Grantees KH&PP) and a CIHR Foundation Award (KH). We would like to acknowledge Manuel  
420 Belmadani, Eric Chu and Nathan Holmes for their assistance on variant selection and annotation.

421

422 **DECLARATION OF INTERESTS**

423 The authors declare no competing interests.

424

425

426           **REFERENCES**

- 427           1. Jeyabalan, N., and Clement, J.P. (2016). SYNGAP1: Mind the gap. *Front. Cell.*  
428 *Neurosci. 10*,.
- 429           2. Walkup, W.G., Washburn, L., Sweredoski, M.J., Carlisle, H.J., Graham, R.L., Hess, S.,  
430 and Kennedy, M.B. (2015). Phosphorylation of synaptic GTPase-activating protein (synGAP) by  
431 Ca<sup>2+</sup>/Calmodulin-dependent protein kinase II (CaMKII) and cyclin-dependent kinase 5 (CDK5)  
432 alters the ratio of its GAP activity toward ras and rap GTPases. *J. Biol. Chem. 290*, 4908–4927.
- 433           3. Araki, Y., Zeng, M., Zhang, M., and Hugarir, R.L. (2015). Rapid Dispersion of SynGAP  
434 from Synaptic Spines Triggers AMPA Receptor Insertion and Spine Enlargement during LTP.  
435 *Neuron 85*, 173–189.
- 436           4. Wang, C.C., Held, R.G., and Hall, B.J. (2013). SynGAP regulates protein synthesis and  
437 homeostatic synaptic plasticity in developing cortical networks. *PLoS One 8*, e83941.
- 438           5. Pena, V., Hothorn, M., Eberth, A., Kaschau, N., Parret, A., Gremer, L., Bonneau, F.,  
439 Ahmadian, M.R., and Scheffzek, K. (2008). The C2 domain of SynGAP is essential for stimulation  
440 of the Rap GTPase reaction. *EMBO Rep. 9*, 350–355.
- 441           6. Kim, J.H., Liao, D., Lau, L.F., and Hugarir, R.L. (1998). SynGAP: A synaptic RasGAP  
442 that associates with the PSD-95/SAP90 protein family. *Neuron 20*, 683–691.
- 443           7. Chen, H.J., Rojas-Soto, M., Oguni, A., and Kennedy, M.B. (1998). A synaptic Ras-  
444 GTPase activating protein (p135 SynGAP) inhibited by CaM kinase II. *Neuron 20*, 895–904.
- 445           8. Gamache, T.R., Araki, Y., and Hugarir, R.L. (2020). Twenty years of syngap research:  
446 From synapses to cognition. *J. Neurosci. 40*, 1596–1605.
- 447           9. Nicoll, R.A. (2017). A Brief History of Long-Term Potentiation. *Neuron 93*, 281–290.
- 448           10. Herring, B.E., and Nicoll, R.A. (2016). Long-Term Potentiation: From CaMKII to

- 449 AMPA Receptor Trafficking. *Annu. Rev. Physiol.* 78, 351–365.
- 450 11. Zhang, L., Zhang, P., Wang, G., Zhang, H., Zhang, Y., Yu, Y., Zhang, M., Xiao, J.,  
451 Crespo, P., Hell, J.W., et al. (2018). Ras and Rap Signal Bidirectional Synaptic Plasticity via  
452 Distinct Subcellular Microdomains. *Neuron* 98, 783-800.e4.
- 453 12. Zhu, J.J., Qin, Y., Zhao, M., Van Aelst, L., and Malinow, R. (2002). Ras and Rap  
454 control AMPA receptor trafficking during synaptic plasticity. *Cell* 110, 443–455.
- 455 13. Krapivinsky, G., Medina, I., Krapivinsky, L., Gapon, S., and Clapham, D.E. (2004).  
456 SynGAP-MUPP1-CaMKII synaptic complexes regulate p38 MAP kinase activity and NMDA  
457 receptor- dependent synaptic AMPA receptor potentiation. *Neuron* 43, 563–574.
- 458 14. Yang, Y., Tao-Cheng, J.H., Reese, T.S., and Dosemeci, A. (2011). SynGAP moves out  
459 of the core of the postsynaptic density upon depolarization. *Neuroscience* 192, 132–139.
- 460 15. Yang, Y., Tao-Cheng, J.H., Bayer, K.U., Reese, T.S., and Dosemeci, A. (2013).  
461 Camkii-Mediated Phosphorylation Regulates Distributions of Syngap- $\alpha$ 1 and - $\alpha$ 2 at the  
462 Postsynaptic Density. *PLoS One* 8,
- 463 16. Fu, Z., Lee, S.H., Simonetta, A., Hansen, J., Sheng, M., and Pak, D.T.S. (2007).  
464 Differential roles of Rap1 and Rap2 small GTPases in neurite retraction and synapse elimination  
465 in hippocampal spiny neurons. *J. Neurochem.* 100, 118–131.
- 466 17. Finkbeiner, S., and Greenberg, M.E. (1996). Ca<sup>2+</sup>-dependent routes to Ras:  
467 Mechanisms for neuronal survival, differentiation, and plasticity? *Neuron* 16, 233–236.
- 468 18. Panayotis, N., Karpova, A., Kreutz, M.R., and Fainzilber, M. (2015). Macromolecular  
469 transport in synapse to nucleus communication. *Trends Neurosci.* 38, 108–116.
- 470 19. Huang, F., Chotiner, J.K., and Steward, O. (2007). Actin polymerization and ERK  
471 phosphorylation are required for Arc/Arg3.1 mRNA targeting to activated synaptic sites on

472 dendrites. *J. Neurosci.* 27, 9054–9067.

473 20. Saha, R.N., and Dudek, S.M. (2013). Splitting Hares and Tortoises: A classification of  
474 neuronal immediate early gene transcription based on poised RNA polymerase II. *Neuroscience*  
475 247, 175–181.

476 21. Luescher, Christian; Malenka, R.C. (2009). NMDA Receptor-Dependent Long-Term  
477 Potentiation and Long-Term Depression (LTP/LTD) Christian. *Cold Spring H* 28, 3.

478 22. Walkup, W.G., Sweredoski, M.J., Graham, R.L., Hess, S., and Kennedy, M.B. (2018).  
479 Phosphorylation of synaptic GTPase-activating protein (synGAP) by polo-like kinase (Plk2) alters  
480 the ratio of its GAP activity toward HRas, Rap1 and Rap2 GTPases. *Biochem. Biophys. Res.*  
481 *Commun.* 503, 1599–1604.

482 23. Sawada, Y., Nakamura, K., Doi, K., Takeda, K., Tobiume, K., Saitoh, M., Morita, K.,  
483 Komuro, I., De Vos, K., Sheetz, M., et al. (2001). Rap1 is involved in cell stretching modulation  
484 of p38 but not ERK or JNK MAP kinase. *J. Cell Sci.* 114, 1221–1227.

485 24. Lee, K.J., Lee, Y., Rozeboom, A., Lee, J.Y., Udagawa, N., Hoe, H.S., and Pak, D.T.S.  
486 (2011). Requirement for Plk2 in Orchestrated Ras and Rap Signaling, Homeostatic Structural  
487 Plasticity, and Memory. *Neuron* 69, 957–973.

488 25. Kishore, A., Joseph, T., Velayudhan, B., Popa, T., and Meunier, S. (2012). Early, severe  
489 and bilateral loss of LTP and LTD-like plasticity in motor cortex (M1) in de novo Parkinson's  
490 disease. *Clin. Neurophysiol.* 123, 822–828.

491 26. Koch, G., Di Lorenzo, F., Bonni, S., Ponzio, V., Caltagirone, C., and Martorana, A.  
492 (2012). Impaired LTP-but not LTD-like cortical plasticity in Alzheimer's disease patients. *J.*  
493 *Alzheimer's Dis.* 31, 593–599.

494 27. Kaufman, L., Ayub, M., and Vincent, J.B. (2010). The genetic basis of non-syndromic



- 495 intellectual disability: A review. *J. Neurodev. Disord.* 2, 182–209.
- 496 28. Bliss, T.V.P., and Cooke, S.F. (2011). Long-term potentiation and long-term  
497 depression: A clinical perspective. *Clinics* 66, 3–17.
- 498 29. Gou, G., Roca-Fernandez, A., Kilinc, M., Serrano, E., Reig-Viader, R., Araki, Y.,  
499 Hugarir, R.L., de Quintana-Schmidt, C., Rumbaugh, G., and Bayés, À. (2020). SynGAP Splice  
500 Variants Display Heterogeneous Spatio-Temporal Expression And Subcellular Distribution In The  
501 Developing Mammalian Brain. *J. Neurochem.* e14988.
- 502 30. Vlaskamp, D.R.M., Shaw, B.J., Burgess, R., Mei, D., Montomoli, M., Xie, H., Myers,  
503 C.T., Bennett, M.F., Xiangwei, W., Williams, D., et al. (2019). SYNGAP1 encephalopathy: A  
504 distinctive generalized developmental and epileptic encephalopathy. *Neurology* 92, E96–E107.
- 505 31. Parker, M.J., Fryer, A.E., Shears, D.J., Lachlan, K.L., Mckee, S.A., Magee, A.C.,  
506 Mohammed, S., Vasudevan, P.C., Park, S.M., Benoit, V., et al. (2015). De novo, heterozygous,  
507 loss-of-function mutations in SYNGAP1 cause a syndromic form of intellectual disability. *Am. J.*  
508 *Med. Genet. Part A* 167, 2231–2237.
- 509 32. Berryer, M.H., Hamdan, F.F., Klitten, L.L., Møller, R.S., Carmant, L.,  
510 Schwartzenuber, J., Patry, L., Dobrzeniecka, S., Rochefort, D., Neugnot-Cerioli, M., et al.  
511 (2013). Mutations in SYNGAP1 Cause Intellectual Disability, Autism, and a Specific Form of  
512 Epilepsy by Inducing Haploinsufficiency. *Hum. Mutat.* 34, 385–394.
- 513 33. Clement, J.P., Aceti, M., Creson, T.K., Ozkan, E.D., Shi, Y., Reish, N.J., Almonte,  
514 A.G., Miller, B.H., Wiltgen, B.J., Miller, C.A., et al. (2012). Pathogenic SYNGAP1 mutations  
515 impair cognitive development by disrupting maturation of dendritic spine synapses. *Cell* 151, 709–  
516 723.
- 517 34. Singh, T., Neale, B., Daly, M., and Schizophrenia Exome Meta-Analysis Consortium

- 518 (2019). Initial Results From the Meta-Analysis of the Whole-Exomes of Over 20,000  
519 Schizophrenia Cases and 45,000 Controls. *Eur. Neuropsychopharmacol.* *29*, S813–S814.
- 520 35. Abrahams, B.S., Arking, D.E., Campbell, D.B., Mefford, H.C., Morrow, E.M., Weiss,  
521 L.A., Menashe, I., Wadkins, T., Banerjee-Basu, S., and Packer, A. (2013). SFARI Gene 2.0: A  
522 community-driven knowledgebase for the autism spectrum disorders (ASDs). *Mol. Autism* *4*, 36.
- 523 36. Kozol, R.A., Cukier, H.N., Zou, B., Mayo, V., De Rubeis, S., Cai, G., Griswold, A.J.,  
524 Whitehead, P.L., Haines, J.L., Gilbert, J.R., et al. (2015). Two knockdown models of the autism  
525 genes SYNGAP1 and SHANK3 in zebrafish produce similar behavioral phenotypes associated  
526 with embryonic disruptions of brain morphogenesis. *Hum. Mol. Genet.* *24*, 4006–4023.
- 527 37. Kilinc, M., Creson, T., Rojas, C., Aceti, M., Ellegood, J., Vaissiere, T., Lerch, J.P., and  
528 Rumbaugh, G. (2018). Species-conserved SYNGAP1 phenotypes associated with  
529 neurodevelopmental disorders. *Mol. Cell. Neurosci.* *91*, 140–150.
- 530 38. Muhia, M., Yee, B.K., Feldon, J., Markopoulos, F., and Knuesel, I. (2010). Disruption  
531 of hippocampus-regulated behavioural and cognitive processes by heterozygous constitutive  
532 deletion of SynGAP. *Eur. J. Neurosci.* *31*, 529–543.
- 533 39. Guo, X., Hamilton, P.J., Reish, N.J., Sweatt, J.D., Miller, C.A., and Rumbaugh, G.  
534 (2009). Reduced expression of the NMDA receptor-interacting protein SynGAP causes behavioral  
535 abnormalities that model symptoms of schizophrenia. *Neuropsychopharmacology* *34*, 1659–1672.
- 536 40. Barnett, M.W., Watson, R.F., Vitalis, T., Porter, K., Komiyama, N.H., Stoney, P.N.,  
537 Gillingwater, T.H., Grant, S.G.N., and Kind, P.C. (2006). Synaptic Ras GTPase activating protein  
538 regulates pattern formation in the trigeminal system of mice. *J. Neurosci.* *26*, 1355–1365.
- 539 41. Kim, J.H., Lee, H.K., Takamiya, K., and Huganir, R.L. (2003). The role of synaptic  
540 GTPase-activating protein in neuronal development and synaptic plasticity. *J. Neurosci.* *23*, 1119–

541 1124.

542 42. Knuesel, I., Elliott, A., Chen, H.J., Mansuy, I.M., and Kennedy, M.B. (2005). A role  
543 for synGAP in regulating neuronal apoptosis. *Eur. J. Neurosci.* *21*, 611–621.

544 43. Kopanitsa, M. V., Gou, G., Afinowi, N.O., Bayés, À., Grant, S.G.N., and Komiyama,  
545 N.H. (2018). Chronic treatment with a MEK inhibitor reverses enhanced excitatory field potentials  
546 in *Syngap1*<sup>+/-</sup> mice. *Pharmacol. Reports* *70*, 777–783.

547 44. McGuire, J.L., Depasquale, E.A., Funk, A.J., O'Donovan, S.M., Hasselfeld, K.,  
548 Marwaha, S., Hammond, J.H., Hartounian, V., Meador-Woodruff, J.H., Meller, J., et al. (2017).  
549 Abnormalities of signal transduction networks in chronic schizophrenia. *Npj Schizophr.* *3*.

550 45. Balu, D.T. (2016). The NMDA Receptor and Schizophrenia. From Pathophysiology to  
551 Treatment. In *Advances in Pharmacology*, pp. 351–382.

552 46. Komiyama, N.H., Watabe, A.M., Carlisle, H.J., Porter, K., Charlesworth, P., Monti, J.,  
553 Strathdee, D.J.C., O'Carroll, C.M., Martin, S.J., Morris, R.G.M., et al. (2002). SynGAP regulates  
554 ERK/MAPK signaling, synaptic plasticity, and learning in the complex with postsynaptic density  
555 95 and NMDA receptor. *J. Neurosci.* *22*, 9721–9732.

556 47. Nateri, A.S., Raivich, G., Gebhardt, C., Da Costa, C., Naumann, H., Vreugdenhil, M.,  
557 Makwana, M., Brandner, S., Adams, R.H., Jefferys, J.G.R., et al. (2007). ERK activation causes  
558 epilepsy by stimulating NMDA receptor activity. *EMBO J.* *26*, 4891–4901.

559 48. Carlisle, H.J., Manzerra, P., Marcora, E., and Kennedy, M.B. (2008). SynGAP  
560 regulates steady-state and activity-dependent phosphorylation of cofilin. *J. Neurosci.* *28*, 13673–  
561 13683.

562 49. Rumbaugh, G., Adams, J.P., Kim, J.H., and Huganir, R.L. (2006). SynGAP regulates  
563 synaptic strength and mitogen-activated protein kinases in cultured neurons. *Proc. Natl. Acad. Sci.*

- 564 U. S. A. *103*, 4344–4351.
- 565 50. Vazquez, L.E., Chen, H.J., Sokolova, I., Knuesel, I., and Kennedy, M.B. (2004).  
566 SynGAP regulates spine formation. *J. Neurosci.* *24*, 8862–8872.
- 567 51. Beurel, E., Grieco, S.F., and Jopea, R.S. (2015). GSK3: regulation, actions, and  
568 diseases. *Pharmacol Ther.* *0*, 114–131.
- 569 52. Hur, E.M., and Zhou, F.Q. (2010). GSK3 signalling in neural development. *Nat. Rev.*  
570 *Neurosci.* *11*, 539–551.
- 571 53. Bradley, C.A., Peineau, S., Taghibiglou, C., Nicolas, C.S., Whitcomb, D.J., Bortolotto,  
572 Z.A., Kaang, B.K., Cho, K., Wang, Y.T., and Collingridge, G.L. (2012). A pivotal role of GSK-3  
573 in synaptic plasticity. *Front. Mol. Neurosci.* *5*, 1–11.
- 574 54. Seo, M.S., Kim, S.H., Ahn, Y.M., Kim, Y., Jeon, W.J., Yoon, S.C., Roh, M.S., Juhn,  
575 Y.S., and Kim, Y.S. (2007). The effects of repeated administrations of MK-801 on ERK and GSK-  
576  $3\beta$  signalling pathways in the rat frontal cortex. *Int. J. Neuropsychopharmacol.* *10*, 359–368.
- 577 55. Li, L., Fan, Y., Huang, X., Luo, J., Zhong, L., Shu, X. sheng, Lu, L., Xiang, T., Chan,  
578 A.T.C., Yeo, W., et al. (2019). Tumor Suppression of Ras GTPase-Activating Protein RASA5  
579 through Antagonizing Ras Signaling Perturbation in Carcinomas. *IScience* *21*, 1–18.
- 580 56. Post, K.L., Belmadani, M., Ganguly, P., Meili, F., Dingwall, R., McDiarmid, T.A.,  
581 Meyers, W.M., Herrington, C., Young, B.P., Callaghan, D.B., et al. (2019). Multi-model  
582 functionalization of disease-associated PTEN missense mutations identifies multiple molecular  
583 mechanisms underlying protein dysfunction. *BioRxiv* 800011.
- 584 57. Matreyek, K.A., Starita, L.M., Stephany, J.J., Martin, B., Chiasson, M.A., Gray, V.E.,  
585 Kircher, M., Khechaduri, A., Dines, J.N., Hause, R.J., et al. (2018). Multiplex assessment of  
586 protein variant abundance by massively parallel sequencing. *Nat. Genet.* *50*, 874–882.

- 587           58. Mighell, T.L., Evans-Dutson, S., and O’Roak, B.J. (2018). A Saturation Mutagenesis  
588 Approach to Understanding PTEN Lipid Phosphatase Activity and Genotype-Phenotype  
589 Relationships. *Am. J. Hum. Genet.* *102*, 943–955.
- 590           59. Yi, S., Liu, N.N., Hu, L., Wang, H., and Sahni, N. (2017). Base-resolution stratification  
591 of cancer mutations using functional variomics. *Nat. Protoc.* *12*, 2323–2341.
- 592           60. Bill, A., Popa, M.O., Van Diepen, M.T., Gutierrez, A., Lilley, S., Velkova, M.,  
593 Acheson, K., Choudhury, H., Renaud, N.A., Auld, D.S., et al. (2015). Variomics screen identifies  
594 the re-entrant loop of the calcium-activated chloride channel ANO1 that facilitates channel  
595 activation. *J. Biol. Chem.* *290*, 889–903.
- 596           61. Karczewski, K.J., Francioli, L.C., Tiao, G., Cummings, B.B., Alföldi, J., Wang, Q.,  
597 Collins, R.L., Laricchia, K.M., Ganna, A., Birnbaum, D.P., et al. (2019). Variation across 141,456  
598 human exomes and genomes reveals the spectrum of loss-of-function intolerance across human  
599 protein-coding genes. *BioRxiv* 531210.
- 600           62. Landrum, M.J., Lee, J.M., Benson, M., Brown, G.R., Chao, C., Chitipiralla, S., Gu, B.,  
601 Hart, J., Hoffman, D., Jang, W., et al. (2018). ClinVar: Improving access to variant interpretations  
602 and supporting evidence. *Nucleic Acids Res.* *46*, D1062–D1067.
- 603           63. McRae, J.F., Clayton, S., Fitzgerald, T.W., Kaplanis, J., Prigmore, E., Rajan, D., Sifrim,  
604 A., Aitken, S., Akawi, N., Alvi, M., et al. (2017). Prevalence and architecture of de novo mutations  
605 in developmental disorders. *Nature* *542*, 433–438.
- 606           64. Codina-Solà, M., Rodríguez-Santiago, B., Homs, A., Santoyo, J., Rigau, M., Aznar-  
607 Laín, G., Del Campo, M., Gener, B., Gabau, E., Botella, M.P., et al. (2015). Integrated analysis of  
608 whole-exome sequencing and transcriptome profiling in males with autism spectrum disorders.  
609 *Mol. Autism* *6*, 21.

- 610           65. De Rubeis, S., He, X., Goldberg, A.P., Poultney, C.S., Samocha, K., Cicek, A.E., Kou,  
611 Y., Liu, L., Fromer, M., Walker, S., et al. (2014). Synaptic, transcriptional and chromatin genes  
612 disrupted in autism. *Nature* *515*, 209–215.
- 613           66. Brett, M., McPherson, J., Zang, Z.J., Lai, A., Tan, E.S., Ng, I., Ong, L.C., Cham, B.,  
614 Tan, P., Rozen, S., et al. (2014). Massively parallel sequencing of patients with intellectual  
615 disability, congenital anomalies and/or autism spectrum disorders with a targeted gene panel. *PLoS*  
616 *One* *9*,.
- 617           67. Fieremans, N., Van Esch, H., Holvoet, M., Van Goethem, G., Devriendt, K., Rosello,  
618 M., Mayo, S., Martinez, F., Jhangiani, S., Muzny, D.M., et al. (2016). Identification of Intellectual  
619 Disability Genes in Female Patients with a Skewed X-Inactivation Pattern. *Hum. Mutat.* *37*, 804–  
620 811.
- 621           68. Kosmicki, J.A., Samocha, K.E., Howrigan, D.P., Sanders, S.J., Slowikowski, K., Lek,  
622 M., Karczewski, K.J., Cutler, D.J., Devlin, B., Roeder, K., et al. (2017). Refining the role of de  
623 novo protein-truncating variants in neurodevelopmental disorders by using population reference  
624 samples. *Nat. Genet.* *49*, 504–510.
- 625           69. Ahmadian, M.R., Kiel, C., Stege, P., and Scheffzek, K. (2003). Structural fingerprints  
626 of the Ras-GTPase activating proteins neurofibromin and p120GAP. *J. Mol. Biol.* *329*, 699–710.
- 627           70. McQuin, C., Goodman, A., Chernyshev, V., Kametsky, L., Cimini, B.A., Karhohs,  
628 K.W., Doan, M., Ding, L., Rafelski, S.M., Thirstrup, D., et al. (2018). CellProfiler 3.0: Next-  
629 generation image processing for biology. *PLoS Biol.* *16*, e2005970.
- 630           71. Ding, Q., Xia, W., Liu, J.C., Yang, J.Y., Lee, D.F., Xia, J., Bartholomeusz, G., Li, Y.,  
631 Pan, Y., Li, Z., et al. (2005). Erk associates with and primes GSK-3 $\beta$  for its inactivation resulting  
632 in upregulation of  $\beta$ -catenin. *Mol. Cell* *19*, 159–170.

- 633           72. Ollila, S., Bebek, D.D., Jiricny, J., and Nyström, M. (2008). Mechanisms of  
634 pathogenicity in human MSH2 missense mutants. *Hum. Mutat.* *29*, 1355–1363.
- 635           73. Henderson, D.M., Lee, A., and Ervasti, J.M. (2010). Disease-causing missense  
636 mutations in actin binding domain 1 of dystrophin induce thermodynamic instability and protein  
637 aggregation. *Proc. Natl. Acad. Sci. U. S. A.* *107*, 9632–9637.
- 638           74. Walton, M., Woodgate, A.M., Muravlev, A., Xu, R., During, M.J., and Dragunow, M.  
639 (2002). CREB Phosphorylation Promotes Nerve Cell Survival. *J. Neurochem.* *73*, 1836–1842.
- 640           75. Wang, H., Xu, J., Lazarovici, P., Quirion, R., and Zheng, W. (2018). cAMP Response  
641 Element-Binding Protein (CREB): A Possible Signaling Molecule Link in the Pathophysiology of  
642 Schizophrenia. *Front. Mol. Neurosci.* *11*, 1–14.
- 643           76. Wlodkowic, D., Telford, W., Skommer, J., and Darzynkiewicz, Z. (2011). Apoptosis  
644 and Beyond: Cytometry in Studies of Programmed Cell Death.
- 645           77. Walton, M.R., and Dragunow, M. (2000). Is CREB a key to neuronal survival? *Trends*  
646 *Neurosci.* *23*, 48–53.
- 647           78. Lonze, B.E., Riccio, A., Cohen, S., and Ginty, D.D. (2002). Apoptosis, axonal growth  
648 defects, and degeneration of peripheral neurons in mice lacking CREB. *Neuron* *34*, 371–385.
- 649           79. Paraguison, R.C., Higaki, K., Sakamoto, Y., Hashimoto, O., Miyake, N., Matsumoto,  
650 H., Yamamoto, K., Sasaki, T., Kato, N., and Nanba, E. (2005). Polyhistidine tract expansions in  
651 HOXA1 result in intranuclear aggregation and increased cell death. *Biochem. Biophys. Res.*  
652 *Commun.* *336*, 1033–1039.
- 653           80. Salichs, E., Ledda, A., Mularoni, L., Albà, M.M., and De La Luna, S. (2009). Genome-  
654 Wide analysis of histidine repeats reveals their role in the localization of human proteins to the  
655 nuclear speckles compartment. *PLoS Genet.* *5*,.

- 656 81. Paul, A., Nawalpuri, B., Shah, D., Sateesh, S., Muddashetty, R.S., and Clement, J.P.  
657 (2019). Differential regulation of syngap1 translation by FMRP modulates eEF2 mediated  
658 response on NMDAR activity. *Front. Mol. Neurosci.* *12*, 1–14.
- 659 82. Steven, A., and Seliger, B. (2016). Control of CREB expression in tumors: From  
660 molecular mechanisms and signal transduction pathways to therapeutic target. *Oncotarget* *7*,  
661 35454–35465.
- 662 83. Watson, F.L., Heerssen, H.M., Bhattacharyya, A., Klesse, L., Lin, M.Z., and Segal,  
663 R.A. (2001). Neurotrophins use the Erk5 pathway to mediate a retrograde survival response. *Nat.*  
664 *Neurosci.* *4*, 981–988.
- 665 84. Watson, F.L., Heerssen, H.M., Moheban, D.B., Lin, M.Z., Sauvageot, C.M.,  
666 Bhattacharyya, A., Pomeroy, S.L., and Segal, R.A. (1999). Rapid nuclear responses to target-  
667 derived neurotrophins require retrograde transport of ligand-receptor complex. *J. Neurosci.* *19*,  
668 7889–7900.
- 669 85. Riccio, A., Pierchala, B.A., Ciarallo, C.L., and Ginty, D.D. (1997). An NGF-TrkA-  
670 mediated retrograde signal to transcription factor CREB in sympathetic neurons. *Science* (80-. ).  
671 *277*, 1097–1100.
- 672 86. Cox, L.J., Hengst, U., Gurskaya, N.G., Lukyanov, K.A., and Jaffrey, S.R. (2008). Intra-  
673 axonal translation and retrograde trafficking of CREB promotes neuronal survival. *Nat. Cell Biol.*  
674 *10*, 149–159.
- 675 87. Crino, P., Khodakhah, K., Becker, K., Ginsberg, S., Hemby, S., and Eberwine, J.  
676 (1998). Presence and phosphorylation of transcription factors in developing dendrites. *Proc. Natl.*  
677 *Acad. Sci. U. S. A.* *95*, 2313–2318.
- 678 88. Redmond, L., Kashani, A.H., and Ghosh, A. (2002). Calcium regulation of dendritic



- 679 growth via CaM kinase IV and CREB-mediated transcription. *Neuron* 34, 999–1010.
- 680 89. Naguib, A., Bencze, G., Cho, H., Zheng, W., Tocilj, A., Elkayam, E., Faehnle, C.R.,  
681 Jaber, N., Pratt, C.P., Chen, M., et al. (2015). PTEN functions by recruitment to cytoplasmic  
682 vesicles. *Mol. Cell* 58, 255–268.
- 683 90. Medkova, M., and Cho, W. (1998). Mutagenesis of the C2 domain of protein kinase C-  
684  $\alpha$ . Differential roles of Ca<sup>2+</sup> ligands and membrane binding residues. *J. Biol. Chem.* 273, 17544–  
685 17552.
- 686 91. Corbalan-Garcia, S., and Gómez-Fernández, J.C. (2014). Signaling through C2  
687 domains: More than one lipid target. *Biochim. Biophys. Acta - Biomembr.* 1838, 1536–1547.
- 688 92. Nalefski, E.A., and Falke, J.J. (1996). The C2 domain calcium-binding motif: Structural  
689 and functional diversity. *Protein Sci.* 5, 2375–2390.
- 690 93. Cho, W., and Stahelin, R. V. (2006). Membrane binding and subcellular targeting of  
691 C2 domains. *Biochim. Biophys. Acta - Mol. Cell Biol. Lipids* 1761, 838–849.
- 692 94. Babu, M.M., van der Lee, R., de Groot, N.S., and Gsponer, J. (2011). Intrinsically  
693 disordered proteins: Regulation and disease. *Curr. Opin. Struct. Biol.* 21, 432–440.
- 694 95. Garza, A.S., Ahmad, N., and Kumar, R. (2009). Role of intrinsically disordered protein  
695 regions/domains in transcriptional regulation. *Life Sci.* 84, 189–193.
- 696 96. Patil, A., and Nakamura, H. (2006). Disordered domains and high surface charge confer  
697 hubs with the ability to interact with multiple proteins in interaction networks. *FEBS Lett.* 580,  
698 2041–2045.
- 699 97. Watson, M.D., Monroe, J., and Raleigh, D.P. (2018). Size-Dependent Relationships  
700 between Protein Stability and Thermal Unfolding Temperature Have Important Implications for  
701 Analysis of Protein Energetics and High-Throughput Assays of Protein-Ligand Interactions. *J.*

702 Phys. Chem. B *122*, 5278–5285.

703 98. Lee, D.Y., Kim, K.A., Yu, Y.G., and Kim, K.S. (2004). Substitution of aspartic acid  
704 with glutamic acid increases the unfolding transition temperature of a protein. *Biochem. Biophys.*  
705 *Res. Commun.* *320*, 900–906.

706 99. Yang, J.M., Nam, K., Kim, H.C., Lee, J.H., Park, J.K., Wu, K., Lee, E.S., and Steinert,  
707 P.M. (1999). A novel glutamic acid to aspartic acid mutation near the end of the 2B rod domain in  
708 the keratin I chain in epidermolytic hyperkeratosis. *J. Invest. Dermatol.* *112*, 376–379.

709 100. McMahon, A.C., Barnett, M.W., O’Leary, T.S., Stoney, P.N., Collins, M.O., Papadia,  
710 S., Choudhary, J.S., Komiyama, N.H., Grant, S.G.N., Hardingham, G.E., et al. (2012). SynGAP  
711 isoforms exert opposing effects on synaptic strength. *Nat. Commun.* *3*, 1–9.

712 101. MacArthur, D.G., Balasubramanian, S., Frankish, A., Huang, N., Morris, J., Walter,  
713 K., Jostins, L., Habegger, L., Pickrell, J.K., Montgomery, S.B., et al. (2012). A systematic survey  
714 of loss-of-function variants in human protein-coding genes. *Science* (80-. ). *335*, 823–828.

715 102. MacArthur, D.G., and Tyler-Smith, C. (2010). Loss-of-function variants in the  
716 genomes of healthy humans. *Hum. Mol. Genet.* *19*, 125–130.

717 103. Whiffin, N., Roberts, A.M., Minikel, E., Zappala, Z., Walsh, R., O’Donnell-Luria,  
718 A.H., Karczewski, K.J., Harrison, S.M., Thomson, K.L., Sage, H., et al. (2019). Using High-  
719 Resolution Variant Frequencies Empowers Clinical Genome Interpretation and Enables  
720 Investigation of Genetic Architecture. *Am. J. Hum. Genet.* *104*, 187–190.

721

722

723 **FIGURE LEGENDS**

724 **Figure 1. SYNGAP1 variant and functional assay selection.**

725 **a.** Distribution of variants assayed in this study across the length of SYNGAP1, including known  
726 functional domains. Color indicates whether variants were primarily associated with gnomAD,  
727 biochemical control (above functional domains) or ASD/ID (below functional domains). **b.**  
728 Simplified SYNGAP1 impact on signaling pathways, including phospho-residues assayed in this  
729 study.

730

731 **Figure 2. Functional differences of SYNGAP1 variants in ERK, GSK3 $\beta$ , p38 signaling and**  
732 **stability.**

733 **a.** Relative pERK/GAPDH value of transfected cells / untransfected cells. Median value of each  
734 well averaged across wells,  $N \geq 4$  wells for all variants. \* indicates  $p < 0.05$  compared to WT, #  
735 indicates  $p < 0.05$  compared to GFP by t-test. Color indicates primary variant association. **b.**  
736 Scatterplot of pERK vs. pGSK3 $\beta$  functional scores with linear regression. Spearman  $r = 0.81$ ,  
737  $p = 1.5 \times 10^{-14}$ . **c.** Relative pGSK3 $\beta$ /GAPDH value of transfected cells / untransfected cells.  $N \geq 4$   
738 for all variants. **d.** Distribution of pERK functional scores across the length of SYNGAP1,  
739 including domains overlaid at bottom. Red line indicates GFP level, beige line indicates WT  
740 SYNGAP1. **e.** Relative pp38/GAPDH value of transfected cells / untransfected cells. Median value  
741 of each well averaged across wells,  $N \geq 4$  wells for all variants. **f.** Protein stability functional value  
742 as GFP/RFP ratio of transfected cells. Median value of each well averaged across wells,  $N \geq 4$   
743 wells for all variants.

744

745 **Figure 3. Functional differences of SYNGAP1 variants in CREB signaling and SSC scores.**

746 **a.** Relative pCREB/GAPDH value of transfected cells / untransfected cells. Median value of each  
747 well averaged across wells,  $N \geq 4$  wells for all variants. \* indicates  $p < 0.05$  compared to WT, #  
748 indicates  $p < 0.05$  compared to GFP by t-test. Color indicates primary variant association. **b.**  
749 Scatterplot of pCREB vs. pERK functional scores with linear regression. Spearman  $r = 0.61$ ,  
750  $p = 4.4 \times 10^{-7}$ . **c.** Relative SSC value of transfected cells / untransfected cells.  $N \geq 4$  for all variants.  
751 **d.** Scatterplot of pCREB vs. SSC functional scores with linear regression. Spearman  $r = 0.80$ ,  
752  $p = 5.5 \times 10^{-14}$ .

753

754 **Figure 4. Variants of SYNGAP1 exhibit both nuclear exclusion and enrichment.**

755 **a.** Distribution of variant functional scores for nuclear localization measured by sum of nuclear  
756 GFP-SYNGAP1 signal over cytoplasmic GFP-SYNGAP1 signal. Mean value of all transfected  
757 cells that passed quality filter (see Methods) taken from each well, then averaged across wells.  
758  $N \geq 4$  wells for all variants. \* indicates  $p < 0.05$  compared to WT. **b.** Representative images of GFP  
759 and GFP-SYNGAP1 localization in HEK293 cells. Cell nuclei were stained with Hoechst (cyan),  
760 GFP signal in green. **c.** Scatterplot of pCREB vs. nuclear localization functional scores with linear  
761 regression. Spearman  $r = 0.53$ ,  $p = 1.5 \times 10^{-5}$ .

762

763 **Figure 5. SYNGAP1 localizes to nuclear puncta in HEK293 cells.**

764 **a.** Distribution of variant functional scores for nuclear speckle localization measured by the  
765 percentage nuclear puncta in transfected cells that passed the nuclear speckle filter and were  
766 smaller than 200 pixels (See Methods). Mean across wells with  $N \geq 4$  wells per variant. \* indicates  
767  $p < 0.05$  compared to WT. **b.** Distribution of variant functional scores for speckle circularity with a  
768 max value of 1. Mean across wells with  $N \geq 4$  wells per variant. **c.** Scatterplot of speckle

769 percentage vs. speckle circularity functional scores with linear regression. Spearman  $r=0.45$ ,  
770  $p=4.0 \times 10^{-4}$ . **d.** Distribution of speckle percentage functional scores across the length of  
771 SYNGAP1, including domains overlaid at bottom. Red line indicates GFP level, beige line  
772 indicates WT SYNGAP1.

773

774 **Figure 6. Clustering of SYNGAP1 variants by multi-parameter functional assay scores.**

775 **a.** Heatmap of all variant functional scores across assays normalized to WT=1 and GFP=0 except  
776 for nuclear localization and stability. Variants are ordered by amino acid position, with early  
777 termination variants, GFP and WT at the bottom. **b.** Correlation matrix of Spearman  $r$  values. **c.**  
778 Hierarchical clustering heatmap of variants and assays calculated from standardized functional  
779 scores using Seaborn library. Blue-red gradient indicates standardized variant score in respective  
780 assay. **d.** KMeans clustering after PCA performed on all variants in the study. PC-1 accounts for  
781 38.49% of variation in the data, PC-2 accounts for 21.79%. PC-1 primarily accounts for signaling  
782 functional scores PC-2 primarily accounts for localization and stability phenotypes (see Fig S1c  
783 for PC axis weights).

784

785 **Figure 7. High-confidence pathogenicity prediction of SYNGAP1 variants.**

786 **a.** Pathogenicity prediction map for all variants assayed in this study. Blue coloring indicates  
787 variant functional score of <50% in at least 2/3 signaling assays, 2/3 localization assays or stability  
788 assay. If variants had a functional score <50% in any assay, the “ANY DYSFUNCTION” field is  
789 colored blue. Variants that had blue coloring in signaling/localization/stability were classified as  
790 Likely Pathogenic (LP), variants that had no blue coloring in any field were classified as Likely  
791 Benign (LB) and variants that only had blue coloring in the “ANY DYSFUNCTION” field were

792 classified VUS. **b.** Distribution of pathogenicity prediction across the length of SYNGAP1,  
793 including known functional domains. ASD/ID-associated variants plotted below functional  
794 domains, non-ASD/ID-associated variants plotted above. **c.** Distribution of pathogenicity  
795 prediction across different primary variant association, split by ASD/ID-associated, gnomAD and  
796 biochemical controls.

797 **SUPPLEMENTAL TABLE LEGENDS**

798 **Table S1:** Variants assayed in this study, clinical phenotypes and sources

799 **Table S2:** Individual results for variants across assays

800 **SUPPLEMENTAL FIGURE LEGENDS**

801 **Figure S1. Supplemental methods figure for flow cytometry gating and PCA-weights.**

802 **a.** Gating strategy for flow cytometry data. Cells were selected from SSC-H vs FSC-H, singlets  
803 were selected from SSC-H vs SSC-A. Cells with low levels of transfection (up to 20-fold above  
804 background fluorescence) were selected from GFP vs. RFP. **b.** p-value matrix of Spearman  
805 correlation  $r$  values in Fig 6b. **c.** Weights of individual components for PC-1 and PC-2 of PCA  
806 analysis performed using sklearn PCA. Larger bars indicate larger contribution of functional scores  
807 within the indicated assay for PC-1 and PC-2 axes.



Figure 1

**a**

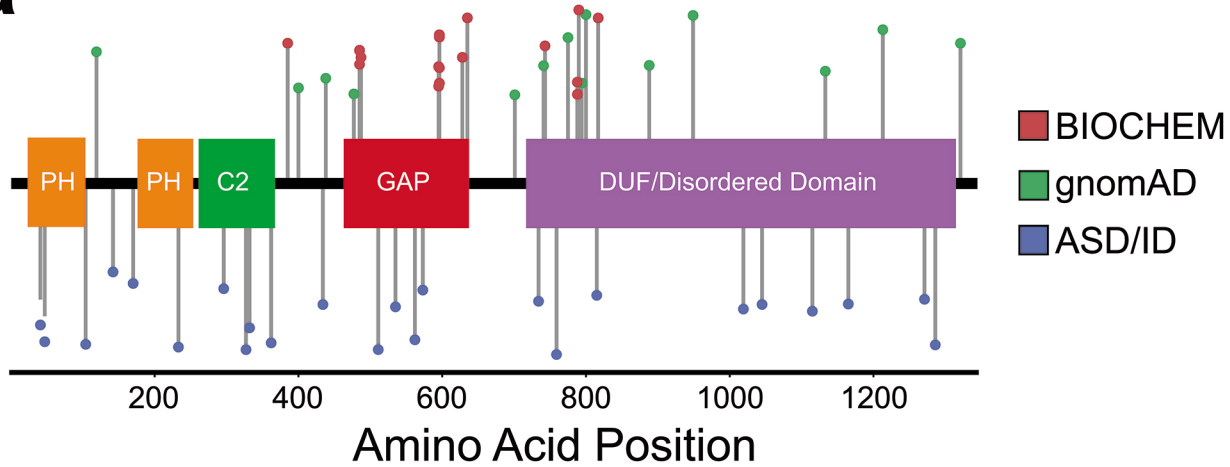

**b**

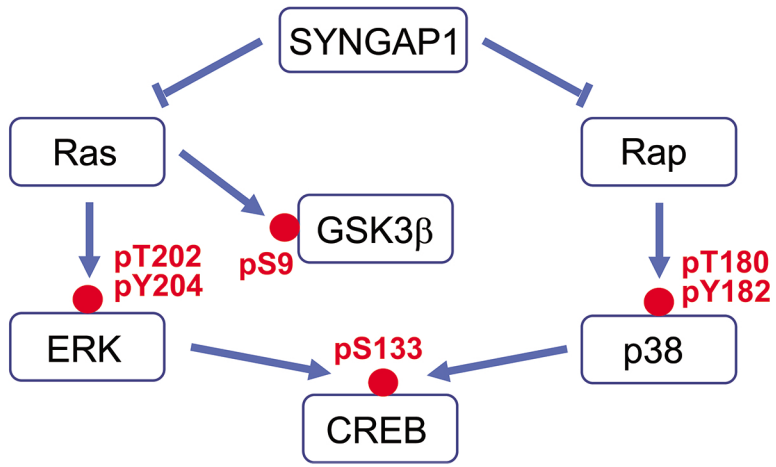

Figure 2

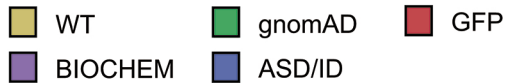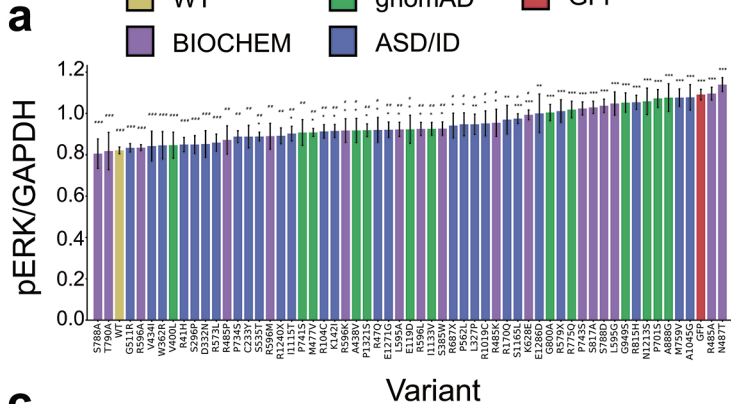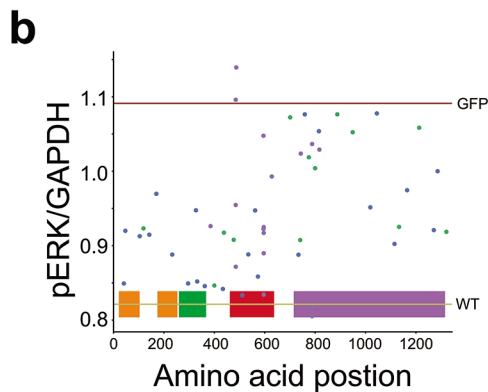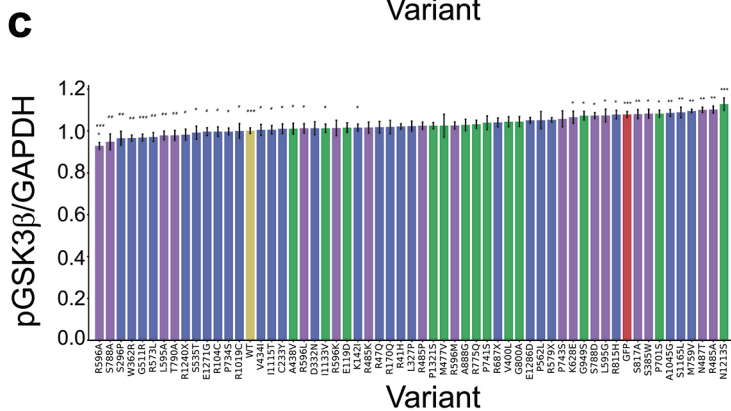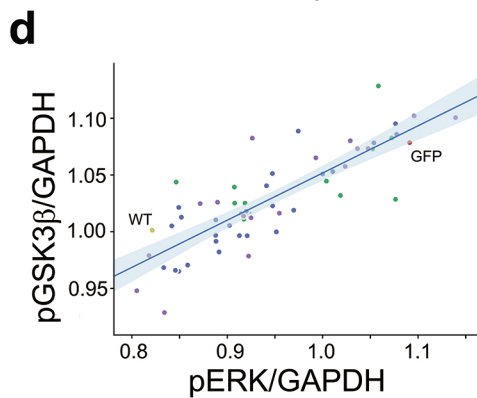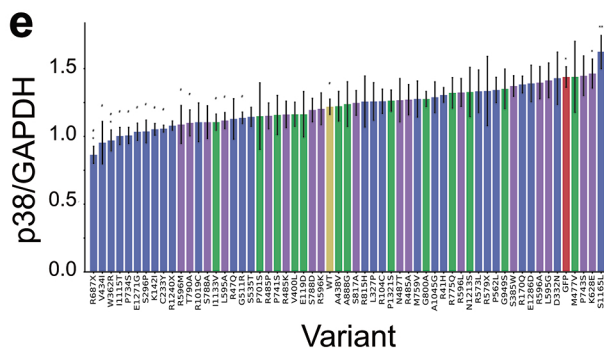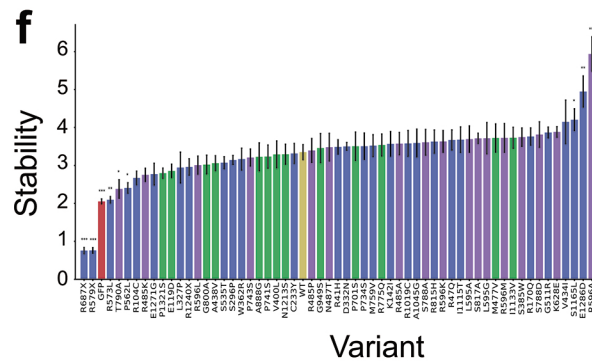

Figure 3

**a**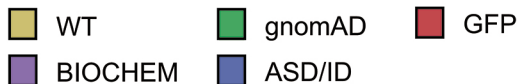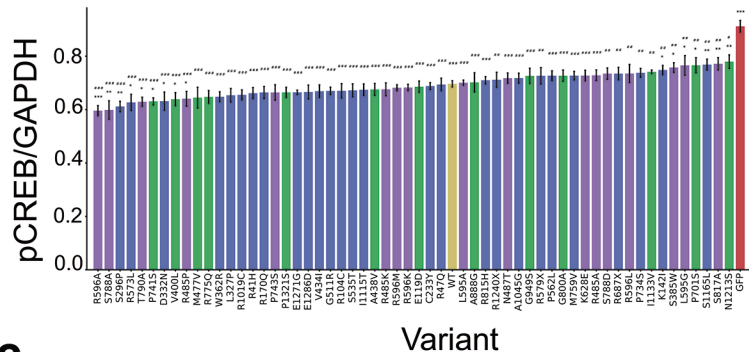**b**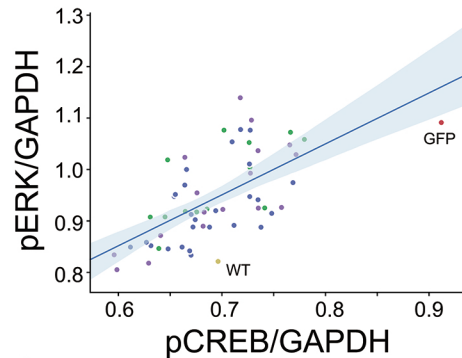**c**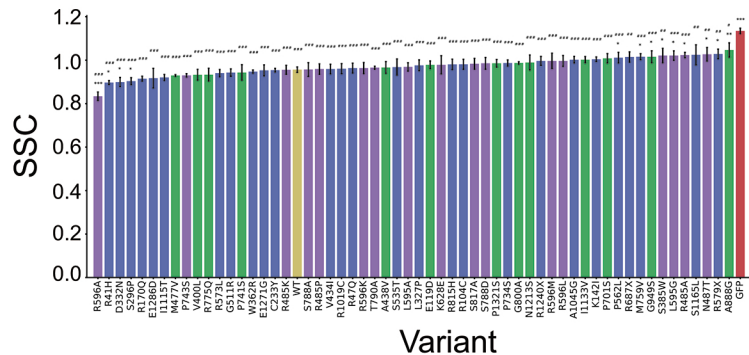**d**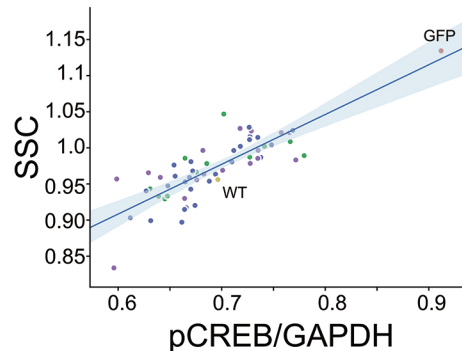

Figure 4

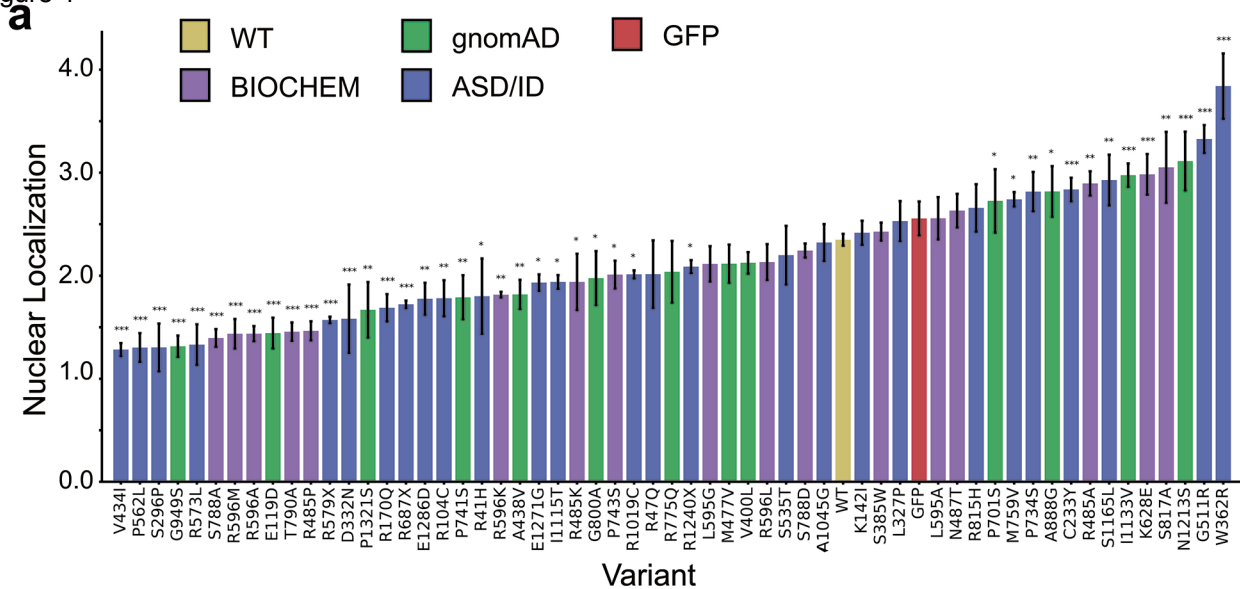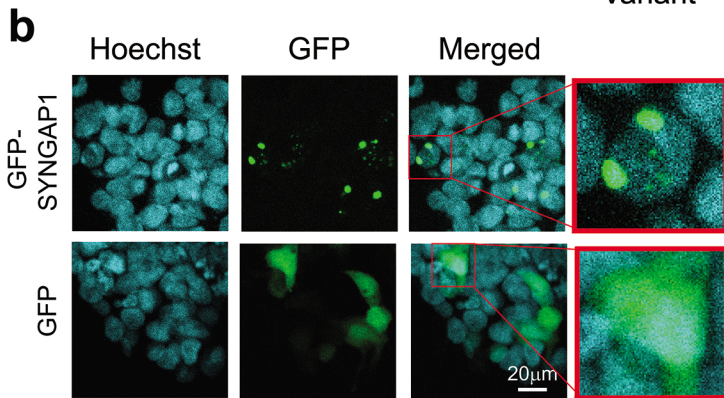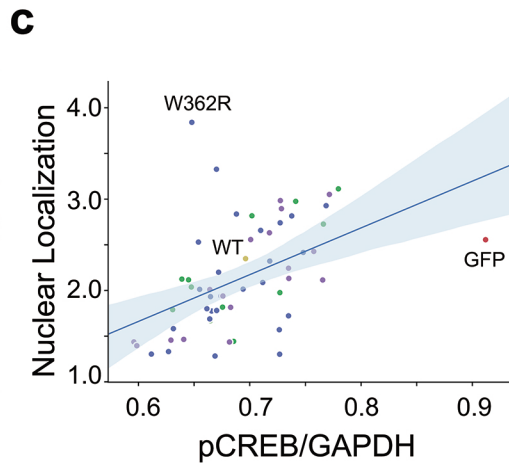

Figure 5

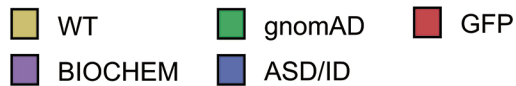

**a**

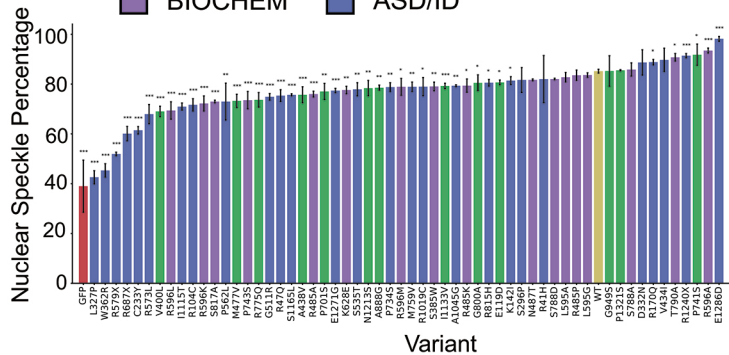

**b**

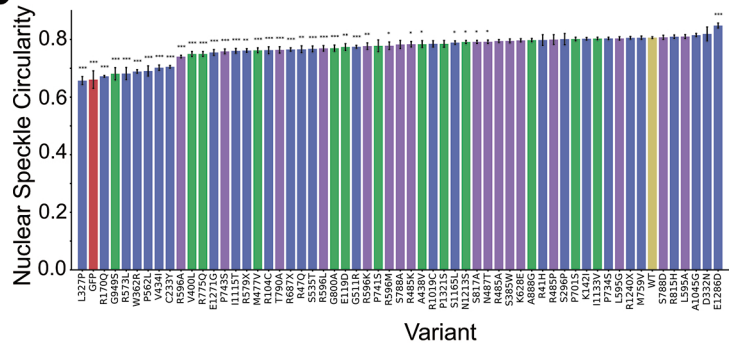

**c**

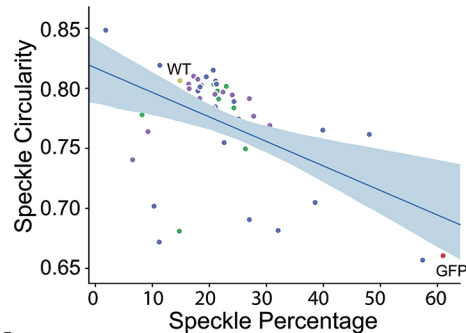

**d**

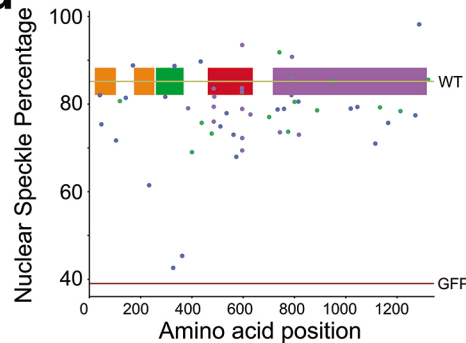

Figure 6

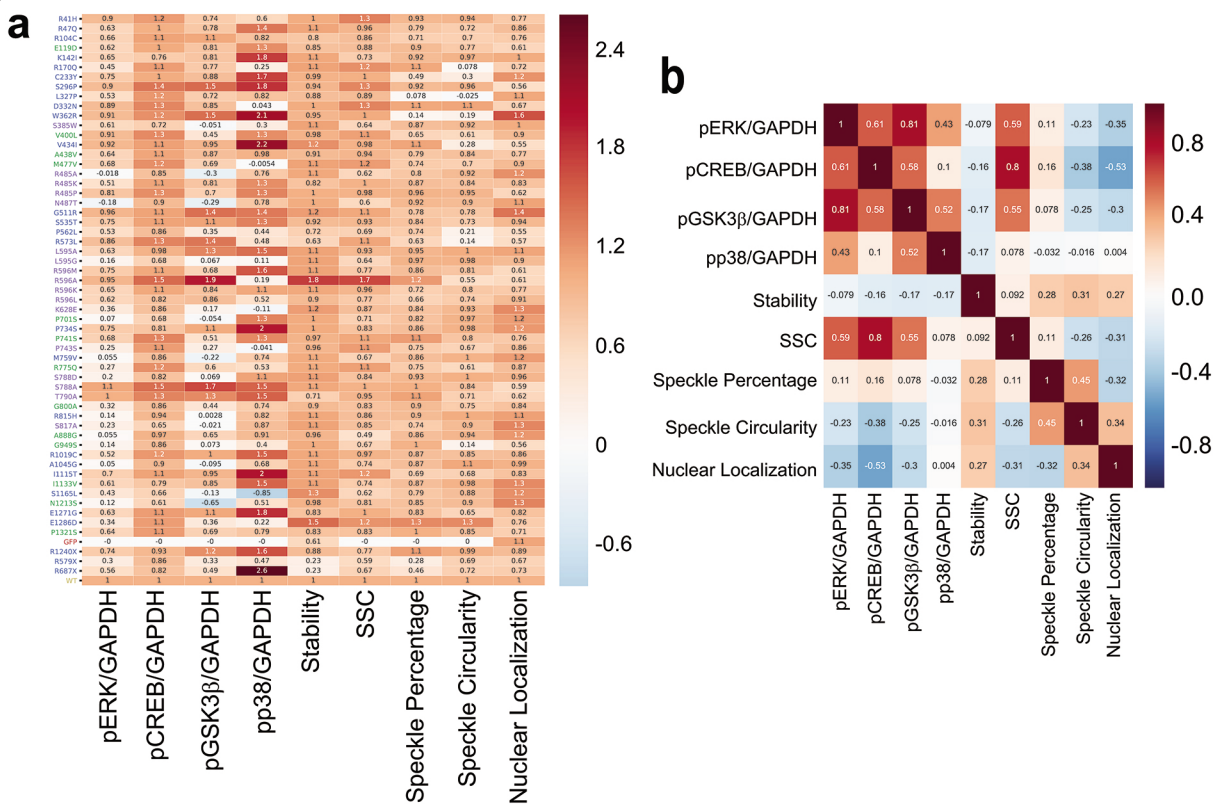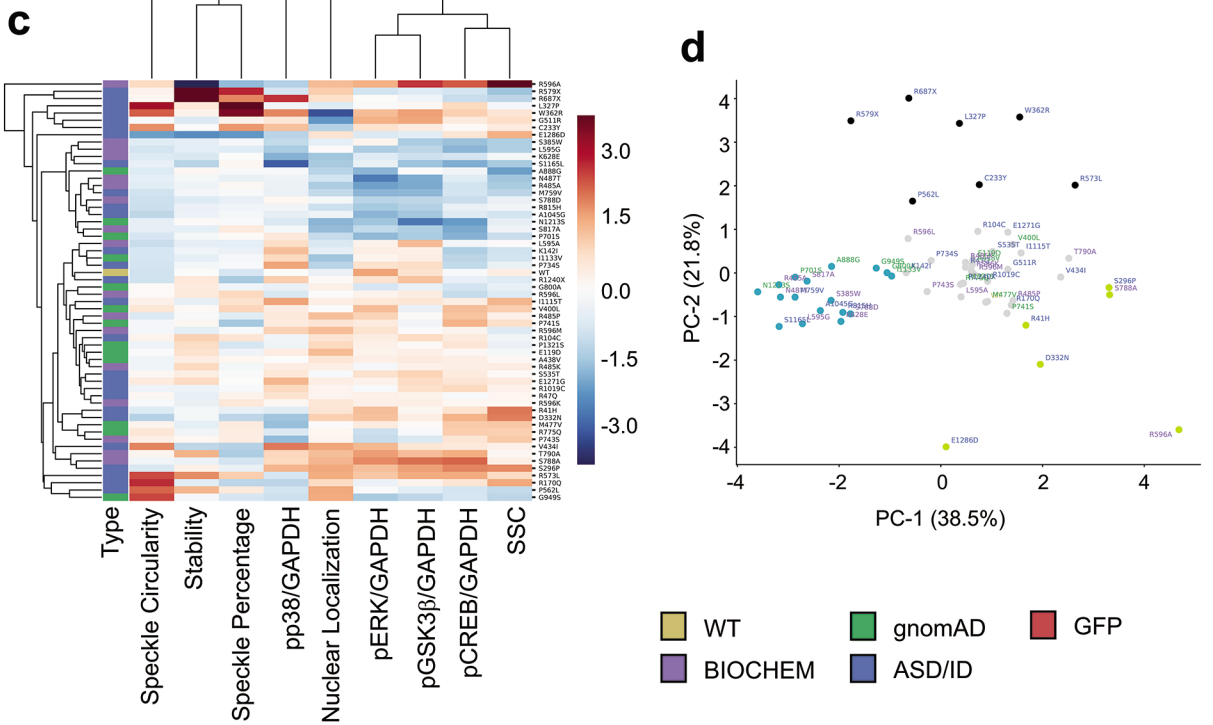

Figure 7

**a**

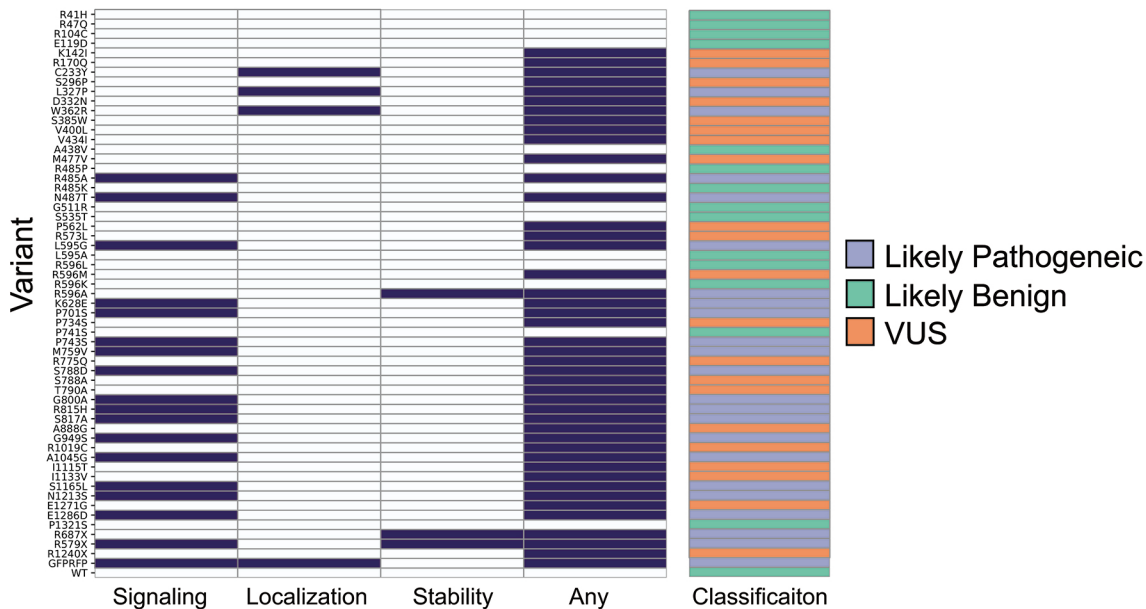

**b**

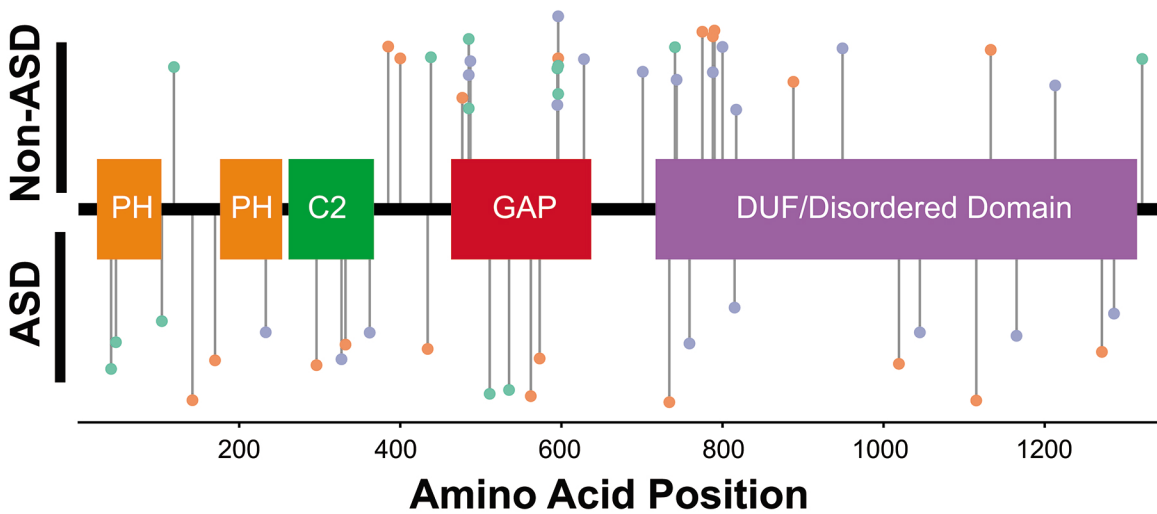

**c**

ASD/ID

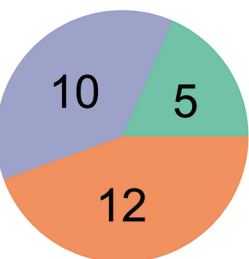

gnomAD

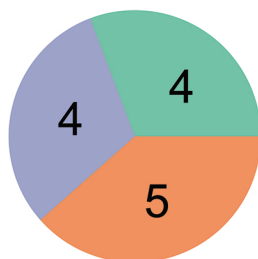

BIOCHEM

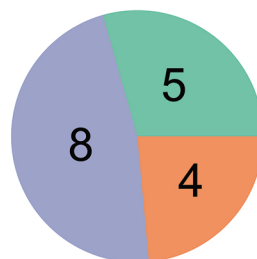

■ Likely Pathogenic

■ Likely Benign

■ VUS
